# Supplementary material
Source: PubMed Central journal article supplement (PMC3660145)
Supplement: NIHMS469476-supplement-2.pdf [file NIHMS469476-supplement-2.pdf]

## Appendix

*Supplementary Material**Figure S1 Top*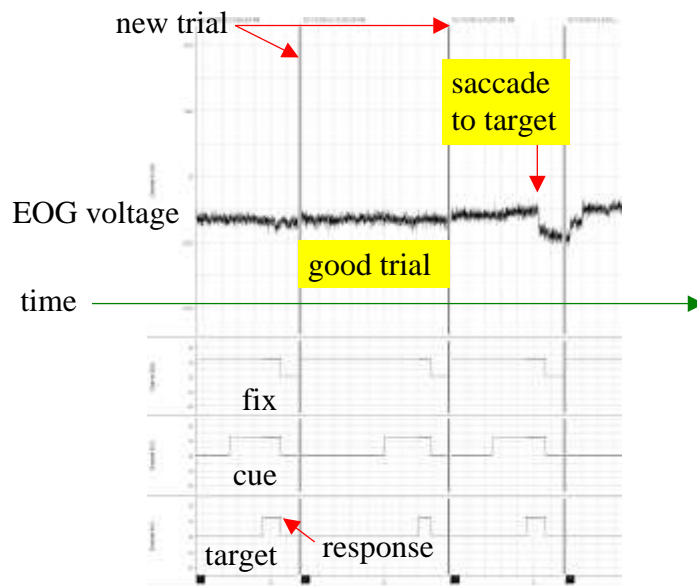

**Brief sample of raw fixation data.** This screen snapshot illustrates our ability to resolve eye movements and to relate these to trial events. In the middle trial (good trial) this subject maintained central fixation. In the next trial (saccade to target) the subject made a ~6.5 degree saccadic eye movement.
